# Supplementary material for: Molecular structure of the ATP-bound, phosphorylated human CFTR
Source: PubMed Central journal article supplement — Proc Natl Acad Sci U S A. 2018 Nov 20;115(50):12757–62. doi: 10.1073/pnas.1815287115 (PMC6294961; doi:10.1073/pnas.1815287115), 2018-11-20
Supplement: pnas.1815287115.sapp.pdf [file pnas.1815287115.sapp.pdf]

## Supporting Information

### Supplemental Figures

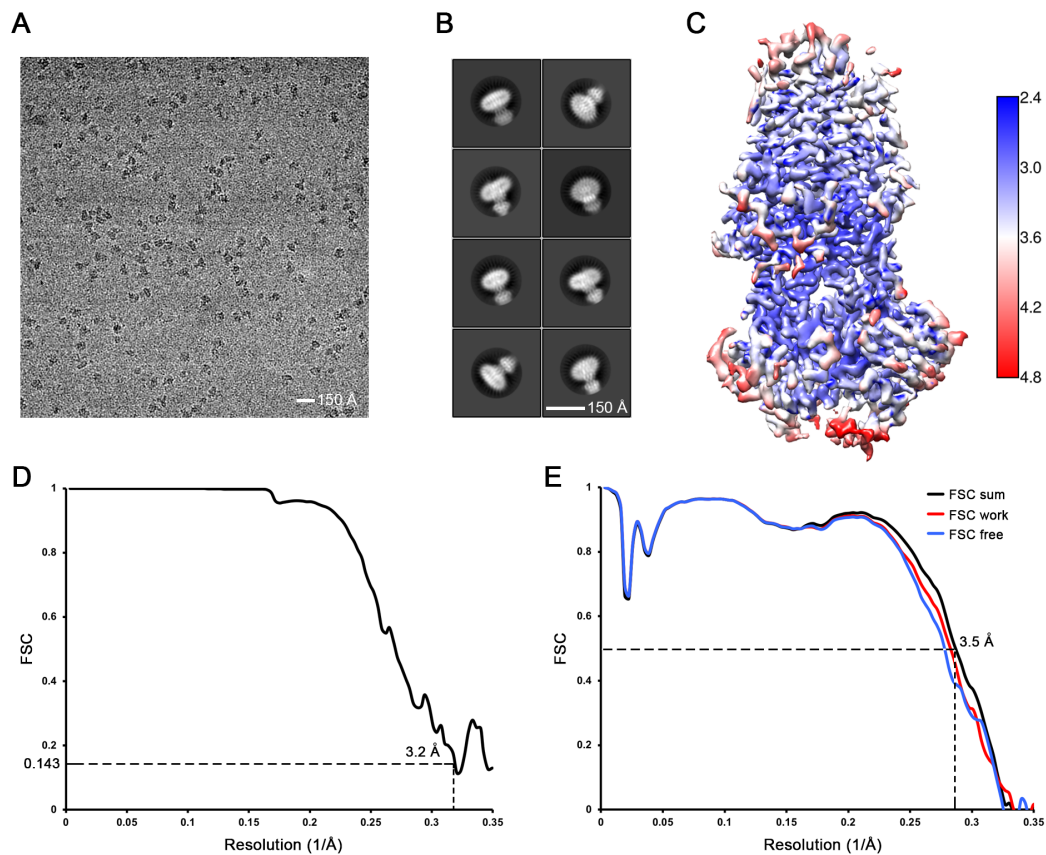

**Fig. S1. Cryo-EM analysis.** (A) A representative summed image at the 2.4 μm defocus level. (B) 2-D class average of the top 8 classes. (C) Local resolution distribution estimated by Blocres (48). (D) Fourier Shell Correlation (FSC) curves between two half-datasets calculated by Frealign (42). (E) FSC curves between the refined structure and the map calculated from the full dataset (sum, black), the half-map used in refinement (work, red), and the other half-map (free, blue).

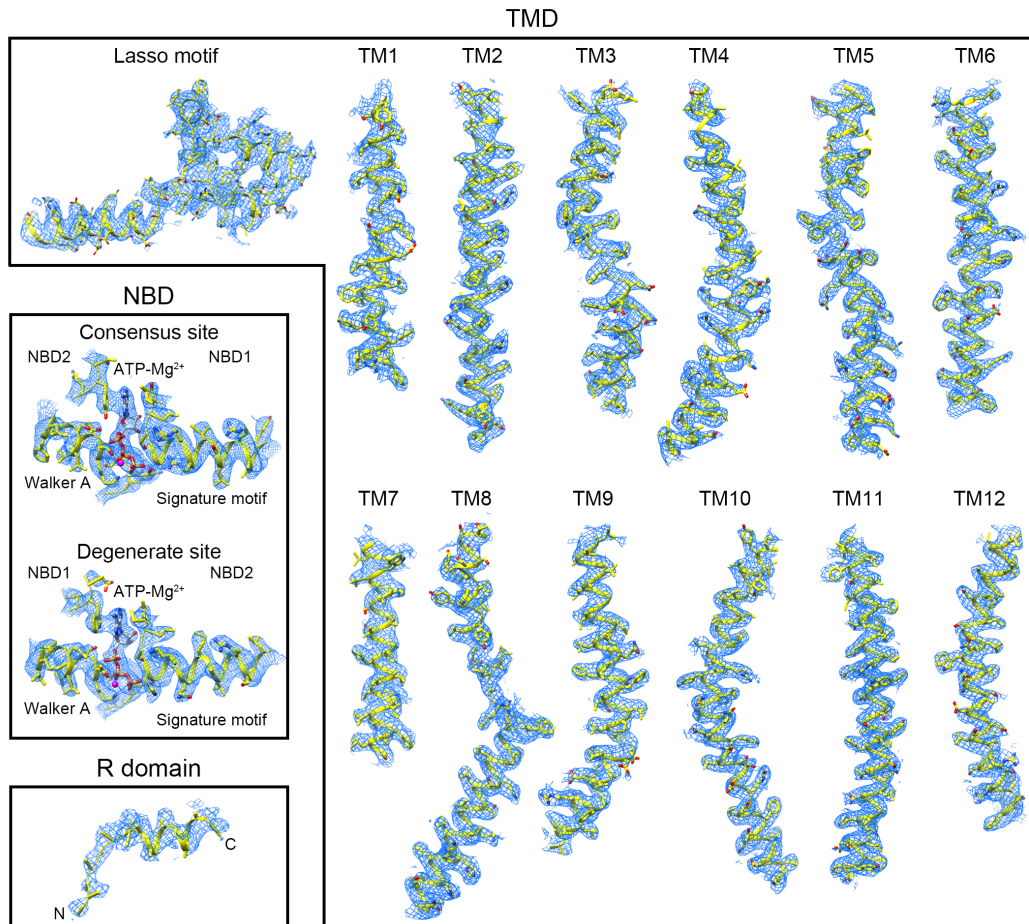

**Fig. S2. B-factor sharpened densities of different regions of CFTR.**

**Table S1. Summary of EM data and structure refinement statistics.**

---

| <b>Data collection</b>                 |                   |
|----------------------------------------|-------------------|
| Microscope                             | Titan Krios (FEI) |
| Voltage (kV)                           | 300               |
| Detector                               | K2 Summit (Gatan) |
| Pixel size (Å)                         | 1.03              |
| Defocus range (µm)                     | 0.8 to 2.5        |
| Movies                                 | 2,093             |
| Frames/movie                           | 50                |
| Dose rate (electrons/pixel/s)          | 8                 |
| Total dose (electrons/Å <sup>2</sup> ) | 75                |
| Number of particles                    | 677,308           |
| <b>Model composition</b>               |                   |
| Non-hydrogen atoms                     | 9,694             |
| Protein residues                       | 1,197             |
| Lipids                                 | 6                 |
| ATP                                    | 2                 |
| Mg <sup>2+</sup>                       | 2                 |
| <b>Refinement</b>                      |                   |
| Resolution (Å)                         | 3.2               |
| Sharpening B-factor (Å <sup>2</sup> )  | -50               |
| RMS deviations                         |                   |
| Bond lengths (Å)                       | 0.013             |
| Bond angles (°)                        | 1.509             |
| <b>Validation</b>                      |                   |
| Molprobity score                       | 1.70              |
| Clashscore, all atoms                  | 7.46              |
| Favored rotamers (%)                   | 94.7              |
| Ramachandran plot (%)                  |                   |
| Favored                                | 95.9              |
| Allowed                                | 4.1               |
| Outliers                               | 0.0               |

---
